# Supplementary material
Source: bioRxiv or medRxiv preprint supplement (https://medrxiv.org/highwire/filestream/93444/field_highwire_adjunct_files/0/2020.08.15.20174284-1.pdf)
Supplement: Supplementary file [file 2020.08.15.20174284-1.pdf]

```

#!/bin/bash -e

#####
#####
#
# Proc script for particular kind of DTI data:
# + DTI: single phase encode (only diff prep)
# + run script under directory containing 'data_basic'; will
  create
#   'data_proc' in parallel to that, if it doesn't exist
  already
#
#####
#####

# THIS ARRAY NEEDS TO BE POPULATED WITH ALL SUBJ IDS
all_subj=( )

here=${PWD}

# define two reference volumes for axializing, below
mni_axlz_ref=${here}/
mni_icbm152_t2_relx_tal_nlin_sym_09a_ACPCE.nii
mni_axlz_wt=${here}/
mni_icbm152_t2_relx_tal_nlin_sym_09a_ACPCE_wtell.nii

cd data_basic/

# get name of each subj dir in the basic tree
for subj in "${all_subj[@]}"
do

    echo "\n\n++ Processing subject:  ${subj} \n\n"

    # ----- which subj, dir setup -----

    # make subject output dir, if necessary
    \mkdir -p ../data_proc/${subj}/

    # ----- convert single set of dwi dicoms -----

    # all dwi dicoms just in a single dir
    echo "\n\n++ Process DWI dicoms \n\n"
    fat_proc_convert_dcm_dwis \
        -indir  ${subj}/pre0p/dwi/ \
        -prefix  ../data_proc/${subj}/dwi_00/DTI \
        -do_movie AGIF

    # ----- convert pre0p t1 anat dicoms -----

```

```

echo "\n\n++ Process pre0p T1w!\n\n"
fat_proc_convert_dcm_anat \
  -indir ${subj}/pre0p/t1w/ \
  -prefix ../data_proc/${subj}/anat_00/t1w_pre

# ----- convert pre0p t2 anat dicoms -----

echo "\n\n++ Process pre0p T2w!\n\n"
fat_proc_convert_dcm_anat \
  -indir ${subj}/pre0p/t2w/ \
  -prefix ../data_proc/${subj}/anat_00/t2w_pre

# ----- convert post0p t1 anat dicoms -----

echo "\n\n++ Process post0p T1w!\n\n"
fat_proc_convert_dcm_anat \
  -indir ${subj}/post0p/t1w/ \
  -prefix ../data_proc/${subj}/anat_00/t1w_post

# ----- convert pre0p CT anat dicoms -----

echo "\n\n++ Process pre0p CT!\n\n"
fat_proc_convert_dcm_anat \
  -indir ${subj}/pre0p/ct/ \
  -prefix ../data_proc/${subj}/anat_00/ct_pre

# ----- convert post0p CT anat dicoms -----

echo "\n\n++ Process post0p CT!\n\n"
fat_proc_convert_dcm_anat \
  -indir ${subj}/post0p/ct/ \
  -prefix ../data_proc/${subj}/anat_00/ct_post

# ----- axialize t1w -----

# alignment programs are parallelized in OpenMP
export OMP_NUM_THREADS=64

# want to have all even slices at end, and with iso res
1x1x1 mm^3
echo "\n\n++ Axialize T2w_pre!\n\n"
fat_proc_axialize_anat \
  -inset ../data_proc/${subj}/anat_00/t2w_pre.nii.gz \
  -prefix ../data_proc/${subj}/anat_01/t2w \
  -mode_t2w \
  -refset ${mni_axlz_ref} \
  -extra_al_wtmask ${mni_axlz_wt} \
  -out_match_ref

# ----- Pick bad volumes-----

```

```

    # fat_proc_select_vols
\
#   -in_dwi ../data_proc/${subj}/dwi_00/DTI.nii.gz
\
#   -in_img ../data_proc/${subj}/dwi_00/
DTI_sepscl.sag.png \
#   -prefix ../data_proc/${subj}/dwi_01/dwi_sel_DTI

# ----- Edit dset volumes -----

# set selstr = `cat ../data_proc/${subj}/dwi_01/
dwi_sel_DTI_goods.txt`
# fat_proc_filter_dwis
\
#   -in_dwi ../data_proc/${subj}/dwi_00/DTI.nii.gz
\
#   -in_col_matT ../data_proc/${subj}/dwi_00/
DTI_matT.dat \
#   -select "${selstr}"
\
#   -prefix ../data_proc/${subj}/dwi_02/DTI

# uncompress the anatomical
gunzip ../data_proc/${subj}/anat_01/t2w.nii.gz

# for DIFFPREP command line, need row-vec and row-bval
format
1dDW_Grad_o_Mat++
\
    -in_col_matT      ../data_proc/${subj}/dwi_00/
DTI_matT.dat \
    -unit_mag_out
\
    -out_row_vec      ../data_proc/${subj}/dwi_01/
DTI_rvec.dat \
    -out_row_bval_sep ../data_proc/${subj}/dwi_01/
DTI_bval.dat

3dcopy
\
    ../data_proc/${subj}/dwi_00/DTI.nii.gz
\
    ../data_proc/${subj}/dwi_01/DTI.nii

# ----- run diffprep (from TORTOISE) -----
# NB: option names do sometimes change across versions

DIFFPREP
\

```

```

--dwi          ../data_proc/${subj}/dwi_01/DTI.nii
\
--bvecs        ../data_proc/${subj}/dwi_01/DTI_rvec.dat
\
--bvals        ../data_proc/${subj}/dwi_01/DTI_bval.dat
\
--structural   ../data_proc/${subj}/anat_01/t2w.nii
\
--phase        vertical
\
--will_be_drugged 0
\
--correction_mode quadratic
\
--gibbs_ringing_correction on
\
--denoising for_final
\
--is_human_brain 1
\
--do_QC 1
\
--high_b 0
\
--res 1.5 1.5 1.5
\
--keep_intermediate 1

# ----- convert tort'ed DWIs to DTI stuff -----

# do autoflip check: not ideal to need this...
@GradFlipTest \
  -in_dwi          ../data_proc/${subj}/dwi_01/DTI_DMC.nii
\
  -in_col_matT    ../data_proc/${subj}/dwi_01/
DTI_DMC.bmtxt    \
  -prefix         ../data_proc/${subj}/dwi_01/
GradFlipTest_rec.txt

  set my_flip = `cat ../data_proc/${subj}/dwi_02/
GradFlipTest_rec.txt`

# tensor estimates, with any flip auto chosen
fat_proc_dwi_to_dt
\
  -in_dwi          ../data_proc/${subj}/dwi_01/DTI_DMC.nii
\
  -in_col_matT    ../data_proc/${subj}/dwi_01/
DTI_DMC.bmtxt    \
  -in_struc_res   ../data_proc/${subj}/dwi_01/

```

```
DTI_DMC_structural.nii \  
    -in_ref_orig ../data_proc/${subj}/anat_01/t2w.nii  
\  
    -prefix      ../data_proc/${subj}/dwi_02/dwi  
\  
    -mask_from_struct  
\  
    ${my_flip}  
  
# DEC map for investigating DT  
fat_proc_decmap  
\  
    -in_fa      ../data_proc/${subj}/dwi_02/dt_FA.nii.gz  
\  
    -in_v1      ../data_proc/${subj}/dwi_02/dt_V1.nii.gz  
\  
    -mask       ../data_proc/${subj}/dwi_02/  
dwi_mask.nii.gz \  
    -prefix     ../data_proc/${subj}/dwi_02/DEC  
done
```
